# Supplementary material for: Underwater wireless communication via TENG-generated Maxwell’s displacement current
Source: PubMed Central journal article supplement (PMC9184604; doi:10.1038/s41467-022-31042-8), 2022-06-09
Supplement: 41467_2022_31042_MOESM2_ESM.pdf [file 41467_2022_31042_MOESM2_ESM.pdf]

## **Description of Additional Supplementary Files**

File Name: Supplementary Movie 1

Description: Modulation and demodulation of current signals for data transmission in water.

File Name: Supplementary Movie 2

Description: Self-powered communication based on the voice-driven TENG.

File Name: Supplementary Movie 3

Description: Self-powered communication based on the button-type TENG.

File Name: Supplementary Movie 4

Description: Underwater communication in a 50 × 30 × 5 m basin.
